# Supplementary material
Source: PubMed Central journal article supplement (PMC4356839)
Supplement: AAC.03913-14_zac999103807so1.pdf [file AAC.03913-14_zac999103807so1.pdf]

1 **Supplemental Material**

2  
3 ***Mycobacterium tuberculosis* Gyrase Inhibitors (MGI) as a New Class of**  
4 **Antitubercular Drugs**

5 *Delia Blanco*<sup>1</sup>, *Esther Perez-Herran*<sup>1#</sup>, *Mónica Cacho*<sup>1#</sup>, *Lluís Ballell*<sup>1</sup>, *Julia Castro*<sup>1</sup>, *Rubén*  
6 *González del Río*<sup>1</sup>, *José Luis Lavandera*<sup>1</sup>, *Modesto J. Remuiñán*<sup>1</sup>, *Cindy Richards*<sup>2</sup>, *Joaquín*  
7 *Rullas*<sup>1</sup>, *María Jesús Vázquez-Muñiz*<sup>3</sup>, *Ermias Woldu*<sup>4</sup>, *María Cleofé Zapatero-González*<sup>3</sup>,  
8 *Iñigo Angulo-Barturen*<sup>1</sup>, *Alfonso Mendoza*<sup>1</sup>, *David Barros*<sup>1</sup>.

9 <sup>1</sup>Diseases of the Developing World, GSK, Severo Ochoa 2, 28760 Tres Cantos, Madrid,  
10 Spain.

11 <sup>2</sup> Antiviral DPU, Infectious Disease Therapeutic Area Unit, GSK, RTP, United States.

12 <sup>3</sup> Molecular Discovery Research, GSK, Santiago Grisolia 4, 28760 Tres Cantos, Madrid,  
13 Spain.

14 <sup>4</sup>TPV, RD Platform Technology & Science, GSK, RTP, United States.

15  
16 ***Compound synthesis***

17 **General information**

18 All commercially available reagents and solvents were used without further purification.

19 When reactions were performed under microwave conditions, a Biotage Initiator was used.

20 Automated flash chromatography was performed on a Biotage FlashMaster II system with

21 peak detection at 254 nm. All products were obtained as amorphous solids and melting

22 points were not measured. <sup>1</sup>H NMR spectra were recorded at 400 MHz on a Bruker

23 Ultrashield DPX 400 spectrometer. Chemical shifts ( $\delta$ ) are given in ppm relative to the

24 solvent reference as an internal standard (d<sub>6</sub>-DMSO,  $\delta$  = 2.50 ppm; CDCl<sub>3</sub>,  $\delta$  = 7.27 ppm;

25 CD<sub>3</sub>OD,  $\delta$  = 3.31 ppm). Data are reported as follows: chemical shift (multiplicity (s for  
26 singlet, d for doublet, t for triplet, m for multiplet, br for broad), integration, coupling  
27 constant(s) in Hz). HPLC–MS analyses were conducted on an Agilent 1100 instrument  
28 equipped with a Sunfire C18 column (30 mm x 2.1 mm i.d., 3.5 mm packing diameter) at  
29 40 °C coupled with a Waters ZMD2000 mass spectrometer; the method of ionization was  
30 alternate-scan positive and negative electrospray. Semi-preparative chiral HPLC were  
31 conducted on an Agilent 1100 instrument equipped with a Chiralpak IC column (250 x 20  
32 mm). Preparative chiral HPLC were conducted on a Varian SD-2 prep HPLC instrument  
33 equipped with a Chiralpak IC column (250 x 50mm i.d, 20  $\mu$ m). Compounds had purity of  
34 >95%, as determined by HPLC and <sup>1</sup>H NMR analysis.

35 **8-Bromo-2,7-dimethoxy-1,5-naphthyridine (1).** 8-Bromo-7-fluoro-2-methoxy-1,5-  
36 naphthyridine (commercial source) (5.14g, 20 mmol) was stirred in methanol (60 mL) at rt  
37 and a solution of sodium methoxide in methanol (10.8g in 44 mL of methanol) was added.  
38 The mixture was heated at 55°C for 4h. The mixture was allowed to cool to rt, then was  
39 diluted with water and brine, and extracted with DCM. The DCM extracts were combined,  
40 dried over anhydrous magnesium sulphate, filtered and evaporated under reduced pressure  
41 to give 8-bromo-2,7-dimethoxy-1,5-naphthyridine as a cream solid (5.05g, 94%). <sup>1</sup>H NMR  
42 (400 MHz, CDCl<sub>3</sub>)  $\delta$  ppm: 8.54 (s, 1H), 8.14 (d, 1H, J=0.03), 7.02 (d, 1H, J=0.03), 4.16 (s,  
43 6H). [ES+ MS] m/z 269/271 (M+H)+.

44 **2,7-Dimethoxy-1,5-naphthyridine (2).** 8-Bromo-2,7-dimethoxy-1,5-naphthyridine (1.7g,  
45 6.3mmol) was stirred in methanol (68 mL) and DCM (10 mL) with sodium hydrogen  
46 carbonate (1.16g, 13.8mmol) and 5% palladium on activated carbon, wet (408 mg), and the  
47 resulting suspension was hydrogenated at 30 psi of hydrogen pressure overnight. The  
48 mixture was filtered. The filtrate was concentrated under reduced pressure and the residue

49 treated with DCM and water. The organic phase was separated, dried over anhydrous  
50 sodium sulphate, filtered and evaporated under reduced pressure to give 2,7-dimethoxy-1,5-  
51 naphthyridine as a white solid (990mg, 85%). <sup>1</sup>H NMR (400 MHz, CDCl<sub>3</sub>) δ ppm: 8.53 (s,  
52 1H), 8.14 (d, 1H, J=0.03), 7.46 (s, 1H), 6.97 (d, 1H, J=0.03), 4.07 (s, 3H), 3.96 (s, 3H).  
53 [ES+ MS] m/z 191 (M+H)+.

54 **7-Methoxy-1,5-naphthyridin-2(1H)-one (3).** A solution of 2,7-dimethoxy-1,5-  
55 naphthyridine (2.05g, 10.8mmol) in 6N HCl (17 mL) was refluxed for 6h. Mixture was  
56 cooled down and water (17 mL) was added and the pH of the suspension was adjusted to  
57 *ca.* pH 6 by addition of solid sodium carbonate and finally 10% sodium hydrogen carbonate  
58 solution. The mixture was then filtered and rinsed with water. Finally, it was dried into the  
59 oven at 40°C under vacuum to give 7-methoxy-1,5-naphthyridin-2(1H)-one (1.85g, 97%).  
60 <sup>1</sup>H NMR (400 MHz, d<sub>6</sub>-DMSO) δ ppm: 11.77 (s, 1H), 8.20 (s, 1H), 7.85 (d, 1H,  
61 J=0.03), 7.13 (s, 1H), 6.53 (d, 1H, J=0.03), 3.86 (s, 3H). [ES+ MS] m/z 177 (M+H)+.

62 **1-Allyl-7-methoxy-1,5-naphthyridin-2(1H)-one (4).** 7-Methoxy-1,5-naphthyridin-2(1H)-  
63 one (1.83g, 10.4mmol) was suspended in a mixture of DME (64 mL) and DMF (16 mL)  
64 under argon at 0 °C, and the stirred suspension was treated with sodium hydride (832mg,  
65 60% suspension in oil, 20.8mmol) and stirred at 0 °C for 45min. Lithium bromide (2.25g,  
66 26mmol) was then added. The reaction was stirred at rt for 30min. Allyl iodide (3.47g,  
67 20.8mmol) was added and the mixture was heated at 75 °C overnight. The mixture was  
68 concentrated under vacuum and the residue was diluted with water and ethyl acetate. The  
69 organic extract was dried over sodium sulphate, filtered and evaporated under reduced  
70 pressure. The residue was purified by chromatography on silica gel using a 0-100%  
71 hexane/ethyl acetate gradient to provide the desired compound as a yellow solid (1.3g,

72 58%). <sup>1</sup>H NMR (400 MHz, CDCl<sub>3</sub>) δ ppm: 8.28 (s, 1H), 7.88 (d, 1H, J=0.03), 7.03 (s, 1H),  
73 6.79 (d, 1H, J=0.03), 6.00-5.88 (m, 1H), 5.26 (d, 1H, J=0.04), 5.11 (d, 1H, J=0.05), 4.91 (d,  
74 2H, J=0.02), 3.94 (s, 3H). [ES+ MS] m/z 217 (M+H)+.

75 **2-(7-Methoxy-2-oxo-1,5-naphthyridin-1(2H)-yl)acetaldehyde (5).** 1-Allyl-7-methoxy-  
76 1,5-naphthyridin-2(1H)-one (1.1g, 5.1mmol) was dissolved in 1,4-dioxane (24 mL) and  
77 water (12 mL). Sodium periodate (2.5g, 11.7mmol) and supported OsO<sub>4</sub> (0.8g, 5% w). The  
78 mixture was stirred at rt for 6h. Mixture was filtered and the polymer washed with water  
79 and THF. Aqueous mixture was extracted with 25% DCM/MeOH. The combined organic  
80 extracts were combined, dried, filtered and evaporated under reduced pressure to give 2-(7-  
81 methoxy-2-oxo-1,5-naphthyridin-1(2H)-yl)acetaldehyde as a pale yellow (1.05g, 95%). %).  
82 <sup>1</sup>H NMR (400 MHz, CDCl<sub>3</sub>) δ ppm: 9.72 (s, 1H), 8.30 (d, 1H), 7.94 (d, 1H), 6.81 (d, 1H),  
83 6.72 (bd, 1H), 5.11 (s, 2H), 3.93 (s, 3H). [ES+ MS] m/z 219, 251 (M+H)+ (consistent with  
84 the hemiacetal structure).

85 **tert-Butyl (1-(2-(7-methoxy-2-oxo-1,5-naphthyridin-1(2H)-yl)ethyl)piperidin-4-**  
86 **yl)carbamate (6).** To a mixture of 2-(7-methoxy-2-oxo-1,5-naphthyridin-1(2H)-  
87 yl)acetaldehyde (1.4g, 6.4mmol) in DCM/MeOH (50/2.5 mL) was added tert-butyl  
88 piperidin-4-ylcarbamate (1.3g, 6.4mmol). After stirring for 1h, sodium  
89 triacetoxyborohydride (4.1g, 19.2 mmol) was added. The reaction was stirred for 1h before  
90 addition of water and saturated sodium hydrogen carbonate solution (50 mL). The reaction  
91 was extracted with 20% DCM/MeOH. The combined organic phases were dried, filtered  
92 and concentrated under vacuum. The residue was purified by chromatography on silica gel  
93 using a 0-20% DCM/MeOH to provide the desired compound as a yellow solid (1.56g,  
94 61%). <sup>1</sup>H NMR (400 MHz, CDCl<sub>3</sub>) δ ppm: 8.27 (d, 1H), 7.83 (d, 1H), 7.17 (bs, 1H), 6.73

95 (d, 1H), 4.44 (bs, 1H), 4.35 (t, 2H), 3.97 (s, 3H), 3.47 (bs, 1H), 2.94 (bd, 2H), 2.64 (t, 2H),  
96 2.26 (t, 2H), 1.95 (bd, 2H), 1.70 (bs, 2H), 1.44 (s, 9H).

97 **1-(2-(4-Aminopiperidin-1-yl)ethyl)-7-methoxy-1,5-naphthyridin-2(1H)-one**

98 **dihydrochloride (7)**. To a solution of tert-butyl (1-(2-(7-methoxy-2-oxo-1,5-naphthyridin-  
99 1(2H)-yl)ethyl)piperidin-4-yl)carbamate (1.55g, 3.86mmol) in DCM (25 mL) was added  
100 HCl (4M solution in 1,4-dioxan, 8 mL). After stirring overnight, the obtained solid was  
101 filtered and dried to give 1.5g (95%) of the title compound.

102 **1-(2-(4-(((2,3-Dihydro-[1,4]dioxino[2,3-c]pyridin-7-yl)methyl)amino)piperidin-1-**

103 **yl)ethyl)-7-methoxy-1,5-naphthyridin-2(1H)-one (8)**. A suspension of 1-(2-(4-  
104 aminopiperidin-1-yl)ethyl)-7-methoxy-1,5-naphthyridin-2(1H)-one dihydrochloride (1.09g,  
105 2.65mmol) in DCM (40 mL) and MeOH (3.5 mL) was treated with triethylamine (1.22 mL,  
106 8.73mmol) and stirred for 15min at rt before the addition of 2,3-dihydro-[1,4]dioxino[2,3-  
107 c]pyridine-7-carbaldehyde (commercial source) (0.42g, 2.51mmol) in one portion. The  
108 mixture was stirred for 30min at rt and sodium triacetoxyborohydride (1.68g, 7.94mmol)  
109 was added in one portion. The reaction was stirred for 2.5h before addition of water and  
110 saturated sodium hydrogen carbonate solution (150 mL). The reaction was extracted with 2-  
111 20% DCM/MeOH. The combined organic phases were dried, filtered and concentrated  
112 under vacuum. The residue was purified by chromatography on silica gel using a 0-20%  
113 DCM/MeOH to provide the desired compound as a yellow solid (0.79g, 66%).

114 **1-(2-(4-(((2,3-Dihydro-[1,4]dioxino[2,3-c]pyridin-7-yl)methyl)amino)piperidin-1-**

115 **yl)ethyl)-7-methoxy-1,5-naphthyridin-2(1H)-one hydrochloride (9)**. 1-(2-(4-(((2,3-  
116 Dihydro-[1,4]dioxino[2,3-c]pyridin-7-yl)methyl)amino)piperidin-1-yl)ethyl)-7-methoxy-  
117 1,5-naphthyridin-2(1H)-one (0.79g, 2.21mmol) was converted to the HCl salt by dissolving  
118 the obtained free base in DCM (10 mL) and MeOH (5 mL) and adding HCl (0.6 mL, 4M in

119 1,4-dioxane). The white suspension was filtered at rt for 15min before evaporating in  
120 vacuum. The white solid was suspended in <sup>t</sup>BuOMe (20 mL) and filtered to yield the title  
121 compound as a white solid (0.775g). <sup>1</sup>H NMR (400 MHz, d<sub>6</sub>-DMSO) δ ppm: 11.38 (bs,  
122 1H), 9.59 (bs, 2H), 8.31 (s, 1H), 8.16 (s, 1H), 7.91 (d, 1H, J = 0.04), 7.69 (bs, 1H), 7.19 (s,  
123 1H), 6.69 (d, 1H, J = 0.04), 4.68 (bs, 2H), 4.38-4.32 (m, 4H), 4.18 (s, 2H), 4.04 (s, 3H),  
124 3.75 (bs, 2H), 3.28 (bs, 3H), 3.05 (bs, 2H), 2.32 (bs, 2H), 2.06 (bs, 2H).

125 **1-Allyl-1,5-naphthyridin-2(1H)-one (10).** 1,5-naphthyridin-2(1H)-one (commercial  
126 available) (500mg, 3.42mmol) and potassium carbonate (1.5g, 10.8mmol) were suspended  
127 in DMF (10 mL). Allyl bromide (1.24g, 10.2mmol) was added in one portion and the  
128 resulting mixture was stirred overnight. The mixture was diluted with water and DCM. The  
129 organic extract was dried over sodium sulphate, filtered and evaporated under reduced  
130 pressure. The residue was purified by chromatography on silica gel using a 0-10%  
131 DCM/MeOH gradient to provide the desired compound (425mg, 67%). [ES+ MS] m/z 187  
132 (M+H)+.

133 **2-(2-Oxo-1,5-naphthyridin-1(2H)-yl)acetaldehyde (11).** 1-Allyl-1,5-naphthyridin-2(1H)-  
134 one (400mg, 2.15mmol) was dissolved in 1,4-dioxane (10 mL) and water (5 mL) and the  
135 solution was cooled to 0°C. Sodium periodate (1.06g, 4.99mmol) was added followed by  
136 OsO<sub>4</sub> (1.60 ml, 4% aqueous solution). The mixture was allowed to warm to room  
137 temperature and stirred overnight. Mixture was concentrated to dryness and dissolved in  
138 water. The aqueous layer was extracted with 10% DCM/MeOH. The combined organic  
139 extracts were combined, dried, filtered and evaporated under reduced pressure to give the  
140 title compound as a mixture with methyl hemiacetal (310mg, 77%).

141 **tert-Butyl (1-(2-(2-oxo-1,5-naphthyridin-1(2H)-yl)ethyl)piperidin-4-yl)carbamate (12).**  
142 To a mixture of 2-(2-oxo-1,5-naphthyridin-1(2H)-yl)acetaldehyde (4.5g, 23.9mmol) and

143 tert-butyl piperidin-4-ylcarbamate (4.785g, 23.9mmol) in DCE (150 mL) was added sodium  
144 triacetoxyborohydride (7.08g, 33.4mmol). The reaction was stirred overnight before  
145 addition of saturated sodium hydrogen carbonate solution (70 mL). The reaction was  
146 extracted with ethyl acetate. The combined organic phases were dried, filtered and  
147 concentrated under vacuum. The residue was purified by chromatography on silica gel  
148 using a 0-20% DCM/MeOH to provide the desired compound as a yellow foam (5.94g,  
149 67%). [ES+ MS] m/z 373 (M+H)+.

150 **1-(2-(4-Aminopiperidin-1-yl)ethyl)-1,5-naphthyridin-2(1H)-one (13).** To a solution of  
151 tert-Butyl (1-(2-(2-oxo-1,5-naphthyridin-1(2H)-yl)ethyl)piperidin-4-yl)carbamate (5.7g,  
152 15.3mmol) in DCM (20 mL) was added trifluoroacetic acid (20 mL). After stirring 2 h, the  
153 mixture was concentrated to dryness and basified until pH 12 with aqueous solution of  
154 NaOH. The organic layer was extracted with DCM to give the title compound (191mg,  
155 88%). <sup>1</sup>H NMR (400 MHz, CDCl<sub>3</sub>) δ ppm: 8.55 (d, 1H), 7.90 (d, 1H), 7.77 (d, 1H), 7.48-  
156 7.44 (m, 1H), 6.91 (d, 1H), 4.38 (t, 2H), 2.99-2.94 (m, 2H), 2.73-2.62 (m, 3H), 2.18 (dt,  
157 2H), 1.87-1.76 (m, 2H), 1.43-1.30 (m, 2H), 1.25-1.13 (m, 2H).

158 **1-(2-(4-((3,4-Dichlorobenzyl)amino)piperidin-1-yl)ethyl)-1,5-naphthyridin-2(1H)-one**  
159 **(14).** A mixture of 1-(2-(4-aminopiperidin-1-yl)ethyl)-1,5-naphthyridin-2(1H)-one (60mg,  
160 0.22mmol) and 3,4-dichlorobenzaldehyde (commercial source) (38.28mg, 0.22mmol) in  
161 DCE (5 mL) was stirred at rt for 1h, and sodium triacetoxyborohydride (65mg, 0.31mmol)  
162 was added. The reaction was stirred overnight before addition of saturated sodium  
163 hydrogen carbonate solution. The reaction was extracted with ethyl acetate. The combined  
164 organic phases were dried, filtered and concentrated under vacuum. The residue was  
165 purified by chromatography on silica gel using a 0-20% DCM/MeOH to provide the desired  
166 compound as a yellow solid (0.79g, 66%). <sup>1</sup>H NMR (400 MHz, CDCl<sub>3</sub>) δ ppm: 8.55 (dd,

167 1H), 7.91 (d, 1H), 7.78 (d, 1H), 7.40 (m, 2H), 7.17 (dd, 1H), 6.91 (d, 1H), 4.38 (t, 2H), 3.76  
168 (s, 2H), 2.97 (d, 2H), 2.64 (t, 2H), 2.50 (m, 1H), 2.18 (t, 2H), 1.87 (d, 2H), 1.42 (m, 4H).  
169 [ES+ MS] m/z 431.

170 **1-(2-(4-((3,4-Dichlorobenzyl)amino)piperidin-1-yl)ethyl)-1,5-naphthyridin-2(1H)-one**  
171 **dihydrochloride (15)**. To a solution of 1-(2-(4-((3,4-dichlorobenzyl)amino)piperidin-1-  
172 yl)ethyl)-1,5-naphthyridin-2(1H)-one (940.6mg, 2.18mmol) in DCM (20 mL) was added  
173 HCl (4M solution in 1,4-dioxan, 1.09 mL). After stirring 10 min, the obtained solid was  
174 filtered and dried to give 1040mg (95%) of the title compound. <sup>1</sup>H NMR (400 MHz, d<sub>6</sub>-  
175 DMSO) δ ppm: 10.97-10.85 (m, 1H), 9.82-9.67 (m, 2H), 8.56 (d, 1H), 8.32-8.16 (m, 1H),  
176 7.99-7.94 (m, 2H), 7.74-7.58 (m, 3H), 6.90 (d, 1H), 4.68-4.52 (m, 2H), 4.19 (s, 2H), 3.83-  
177 3.66 (m, 1H), 3.21-3.04 (m, 2H), 2.40-1.90 (m, 4H). [ES+ MS] m/z 431. (M+H)+.

178 **1-(2-(4-((3,4-Dichlorobenzyl)amino)piperidin-1-yl)ethyl)-7-methoxy-1,5-naphthyridin-**  
179 **2(1H)-one (16)**. A suspension of 1-(2-(4-aminopiperidin-1-yl)ethyl)-7-methoxy-1,5-  
180 naphthyridin-2(1H)-one dihydrochloride (0.189g, 0.46mmol) in DCM (6 mL) and MeOH  
181 (0.6mL) was treated with triethylamine (0.21 mL, 1.51mmol) and stirred for 15min at rt  
182 before the addition of 3,4-dichlorobenzaldehyde (commercial source) (0.076g, 0.43mmol)  
183 in one portion. The mixture was stirred for 30min at rt and sodium triacetoxyborohydride  
184 (0.9g, 4.11mmol) was added. The reaction was stirred overnight before addition of  
185 saturated sodium hydrogen carbonate solution. The reaction was extracted with 20%  
186 DCM/MeOH. The combined organic phases were dried, filtered and concentrated under  
187 vacuum. The residue was purified by chromatography on silica gel using a 0-20%  
188 DCM/MeOH to provide the desired compound as a yellow solid (82mg, 40%). <sup>1</sup>H NMR  
189 (400 MHz, CDCl<sub>3</sub>) δ ppm: 8.28 (d, 1H), 7.84 (d, 1H), 7.44 (s, 1H), 7.38 (d, 2H), 7.25 (bd,



190 1H), 7.16 (d, 1H), 6.73 (d, 1H), 4.38 (t, 2H), 3.98 (s, 3H), 3.77 (s, 2H), 2.99 (bd, 2H), 2.66  
191 (t, 2H), 2.58-2.45 (m, 2H), 2.28-2.15 (m, 2H), 1.95 (d, 2H), 1.50-1.35 (m, 2H). [ES+ MS]  
192 m/z 461 (M+H)+.

193

#### 194 ***In vitro* assays**

195 **Intracellular Viability assay.** THP1 cells are maintained in suspension with RPMI-1640  
196 media containing 10% FBS, 1mM of Pyruvate, 2mM of L-Glutamine, and incubated at 37  
197 °C with 5% CO<sub>2</sub>. Prior to day of infection, *M. tuberculosis* H37Rv was grown at 37°C in  
198 Middlebrock 7H9-ADC –Tween80 to mid-exponential phase and then diluted 1/100 in  
199 200ml Middlebrock 7H9-ADC –Tween80 in a roller bottle and incubate at 37°C until an  
200 OD 600 nm between 0.6-1 at time of infection. 160 ml (5 x 50mL sterile tubes) of  
201 mycobacterial cultures were pelleted at 3500 rpm for 10 min. The bacterial pellet of each  
202 tube was aseptically dispersed by shaking with 10 glass beads during 60 seconds. Then, 6  
203 mL of RPMI fresh media were added and it was left to sediment during 5 minutes.  
204 Afterwards, 5 mL of the supernatant were taken carefully and the rest was discarded.  
205 Finally, OD 600 nm of dispersed bacterial suspension was measured and the bacteria  
206 number was calculated by using the following conversion: An OD of 0.1 = 10<sup>8</sup> CFU/mL.  
207 Monocytes are grown to sub-confluence (5x10<sup>5</sup> cell/ml) and infected ON in a cell roller  
208 bottle with a multiplicity of infection (MOI) of 10 for BCG or infected during 4h with a  
209 MOI of 1 for H37Rv. Excess bacteria are removed by washing five times in RPMI media  
210 (1500 rpm 5min.). Then, 100 ul/well (50.000 cells/well) of infected cells are dispensed in  
211 96 well white plates. Afterwards 1:3 serial dilutions of antitubercular agents are added to  
212 the cell plates. As DMSO damages cells, the percentage must be reduced under 0.5% by  
213 diluting 1:400 in culture medium. Luminescence is measured after 5 days using the Steady-

214 Glo Promega kit into a Victor 1420 system. MIC90 values are calculated from the dose-  
 215 response curves by non-linear regression analysis.

216 **Cytotoxicity experiments.** Experimental procedures were used as described previously (1).

217 **Reversion of the mutations.**

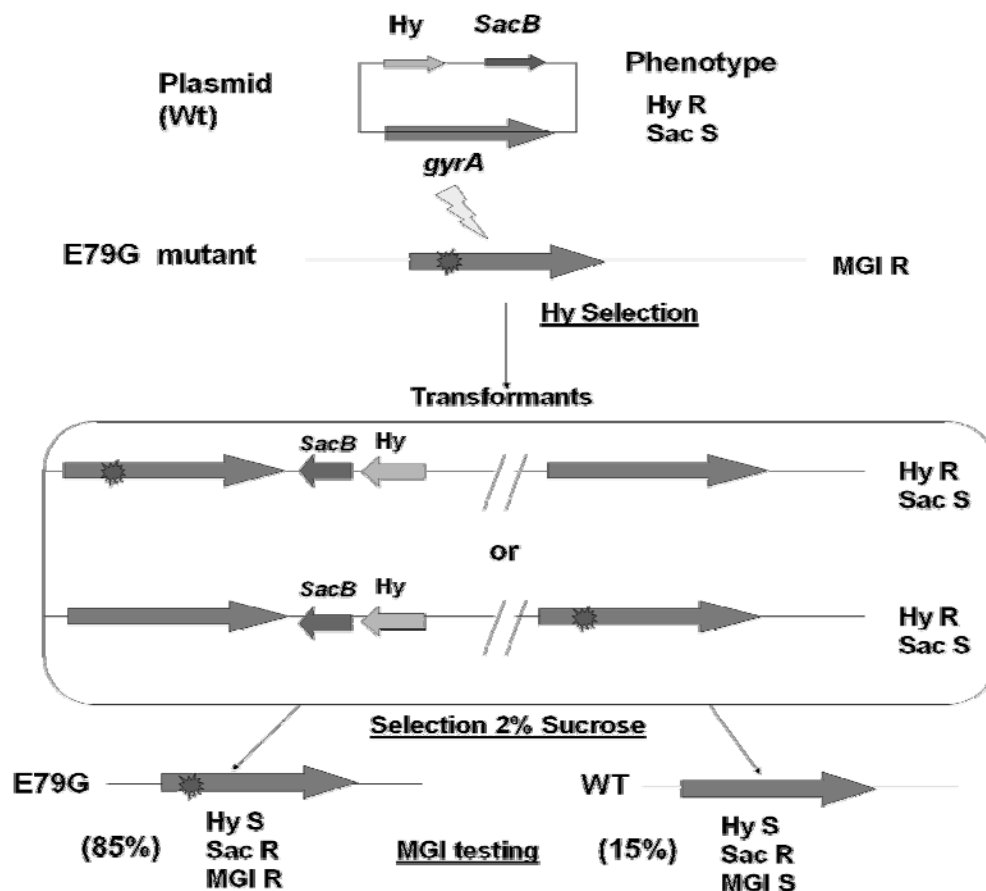

218

219 **Fig. S1.** In the first homologous recombination, *Hyg<sup>R</sup>* are selected as the ones which have  
 220 included the wild type gene. In the second homologous recombination, *Hyg<sup>S</sup>-Sucrose<sup>R</sup>* are  
 221 selected as the ones that have lost *Hyg<sup>R</sup>* and *Sac<sup>B</sup>* genes so that recombination has taken  
 222 place. Depending on whether this recombination takes place before or after the mutation,  
 223 we can obtain the resistant mutant or the wild type phenotype. 15% of the transformants  
 224 obtained had reverted to sensitivity.

225 **Microsomal fraction stability experimental procedure.** Experimental procedures were  
226 used as described previously (2).

227 **Inhibition of *Mtb* DNA Gyrase by compounds.** The reactions were initiated by the  
228 addition of 0.3 U of *Mtb* DNA Gyrase, incubated at 37 °C for 60 min and then stopped  
229 using 5 µL of 0.25% v/v bromophenol blue and 50% v/v glycerol. 25 µL (≈500 ng) of the  
230 reaction was then electrophoresed in a 1% w/v agarose TAE (40 mM Tris (pH 8.3), 20 mM  
231 acetic acid and 1 mM EDTA)) gel for 3 h at 75 V in TAE running buffer. The gel was  
232 stained in TAE buffer containing Gel Red Nac Stain (0.7 µg/mL) for 1.5 h and then  
233 visualized using a Gel Doc-It Imaging System (UVP Inc.). UVP Vision Works LS Software  
234 was used to quantify the intensity and retention factor (Rf) of the supercoiled DNA band in  
235 each lane and this data was fitted to a generic four-parameter logistical equation using  
236 Grafit software.

237

### 238 ***In vivo* assays**

239 **General aspects and ethics Statement.** The compounds used in this study were prepared  
240 as suspensions in 1% Methyl Cellulose. The antitubercular standards used in the efficacy  
241 study were: Moxifloxacin (Sequoia Research Products Ltd) prepared as solution in 20%  
242 Captisol(R)/water).

243 **Mice.** Specific Pathogen-free 6-8-week-old female C57BL/6j mice (18 – 20g) are obtained  
244 from Harlan (Harlan Interfauna Iberica, Spain). The experiments were performed at  
245 AAALAC-accredited GSK Laboratory Animal Science animal facilities in Tres Cantos  
246 (Madrid, Spain). The mice were kept in air-conditioned facilities with fifteen air changes  
247 per hour. Room temperature and relative humidity were  $22 \pm 3$  °C and 40- 70%,

248 respectively. The mice were accommodated in groups of up to five individuals in  
249 Tecniplast® type IV cages with autoclaved dust free corn cob bedding (Panlab, Barcelona,  
250 Spain). The mice were maintained under a twelve hours light/dark period. Autoclaved tap  
251 water and  $\gamma$ -irradiated pelleted diet were provided ad libitum.

252 All experiments were approved by the Diseases of the Developing World (DDW-GSK)  
253 ethical committee. All animal studies were ethically reviewed and carried out in accordance  
254 with European Directive 2010/63/EU and the GSK Policy on the Care, Welfare and  
255 Treatment of Animals.

256 **Pharmacokinetic studies.** The experimental design has been previously described (2). In  
257 brief, C57BL/6 female mice of 18-20 g weight were used (n=4 mice per time point).  
258 Compound 1 was administered by oral gavage at 50 mg/kg single dose at a volume of 20  
259 ml/kg to n=4 mice per time point in saline. Compound 2 was administered by intravenous  
260 route at 10 mg/kg single dose at a volume of 10 ml/kg to n=4 mice per time point in saline  
261 and by oral gavage at 50 mg/kg single dose at a volume of 20 ml/kg to n=4 mice per time  
262 point in saline (pH=3.8). Compound 3 was administered by intravenous route at 5 mg/kg  
263 single dose at a volume of 10 ml/kg to n=4 mice per time point in 20% encapsin/saline and  
264 by oral gavage at 10 mg/kg single dose at a volume of 20 ml/kg to n=4 mice per time point  
265 in water (pH=3.6). Peripheral total blood was the compartment chosen for the establishment  
266 of compound concentrations: aliquots of 25  $\mu$ l of blood were taken by cardiac puncture for  
267 each mouse (euthanized by CO<sub>2</sub>) at 10, 20, 30 minutes, 1, 1.5, 2, 3, 4 and 8 hours for  
268 intravenous route and at 15, 30, 45 minutes, 1, 1.5, 2, 3, 4 and 8 hours for oral route (n=4  
269 mice per time point).

270

271 **REFERENCES**

272 1. **Crouch SPM, Kozlowski R, Slater KJ, Fletcher J.** 1993. The use of ATP  
273 bioluminescence as a measure of cell proliferation and cytotoxicity. *J. Immunol. Methods*  
274 **160**:81-88.

275 2. **Remuiñán MJ, Pérez-Herrán E, Rullás J, Alemparte C, Martínez-Hoyos M, Dow**  
276 **DJ, Afari J, Mehta N, Esquivias J, Jiménez E, Ortega-Muro F, Fraile-Gabaldón MT,**  
277 **Spivey VL, Loman NL, Pallen MJ, Constantinidou C, Minick DJ, Cacho M, Rebollo-**  
278 **López MJ, González C, Sousa V, Angulo-Barturen I, Mendoza-Losana A, Barros D,**  
279 **Besra GS, Ballell L, Cammack N.** 2013. Tetrahydropyrazolo[1,5-a]Pyrimidine-3-  
280 Carboxamide and N-Benzyl-69,79-Dihydrospiro[Piperidine-4,49-Thieno[3,2-c]Pyran]  
281 Analogues with Bactericidal Efficacy against *Mycobacterium tuberculosis* Targeting  
282 MmpL3. *PLOS ONE* **8**: e60933.

283
